# Supplementary material
Source: PubMed Central journal article supplement (PMC8316051)
Supplement: aac.00144-21-s000s1.pdf [file aac.00144-21-s000s1.pdf]

# Cefepime population pharmacokinetics and target attainment in critically ill patients on continuous renal replacement therapy

## Supplement Material

**Figure S1: Probability of 100%  $fT_{>MIC}$  target attainment a) within the first 24 hours and b) after 72 hours with different blood flow rates, total effluent flow rates, and CRRT downtimes<sup>a,b</sup>**

a)

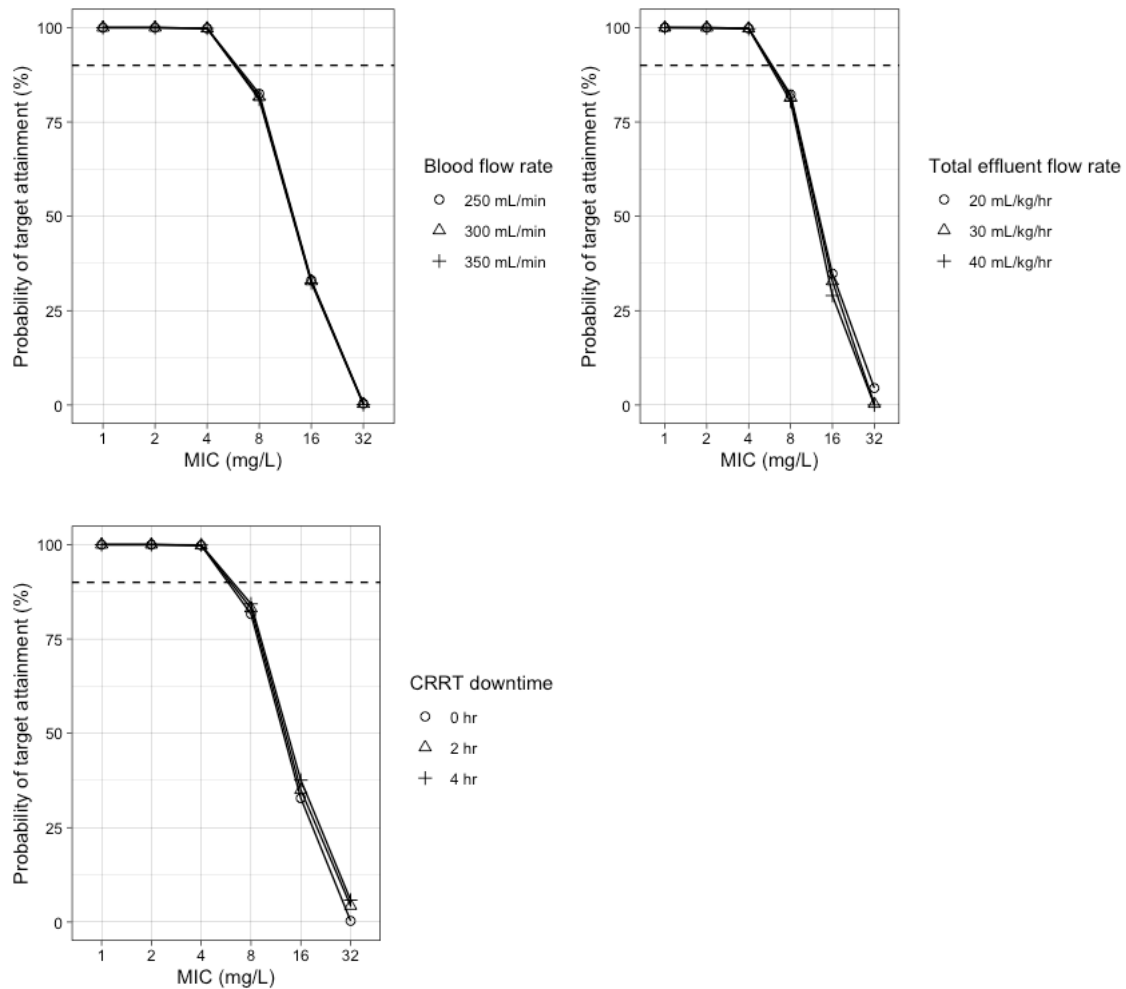

b)

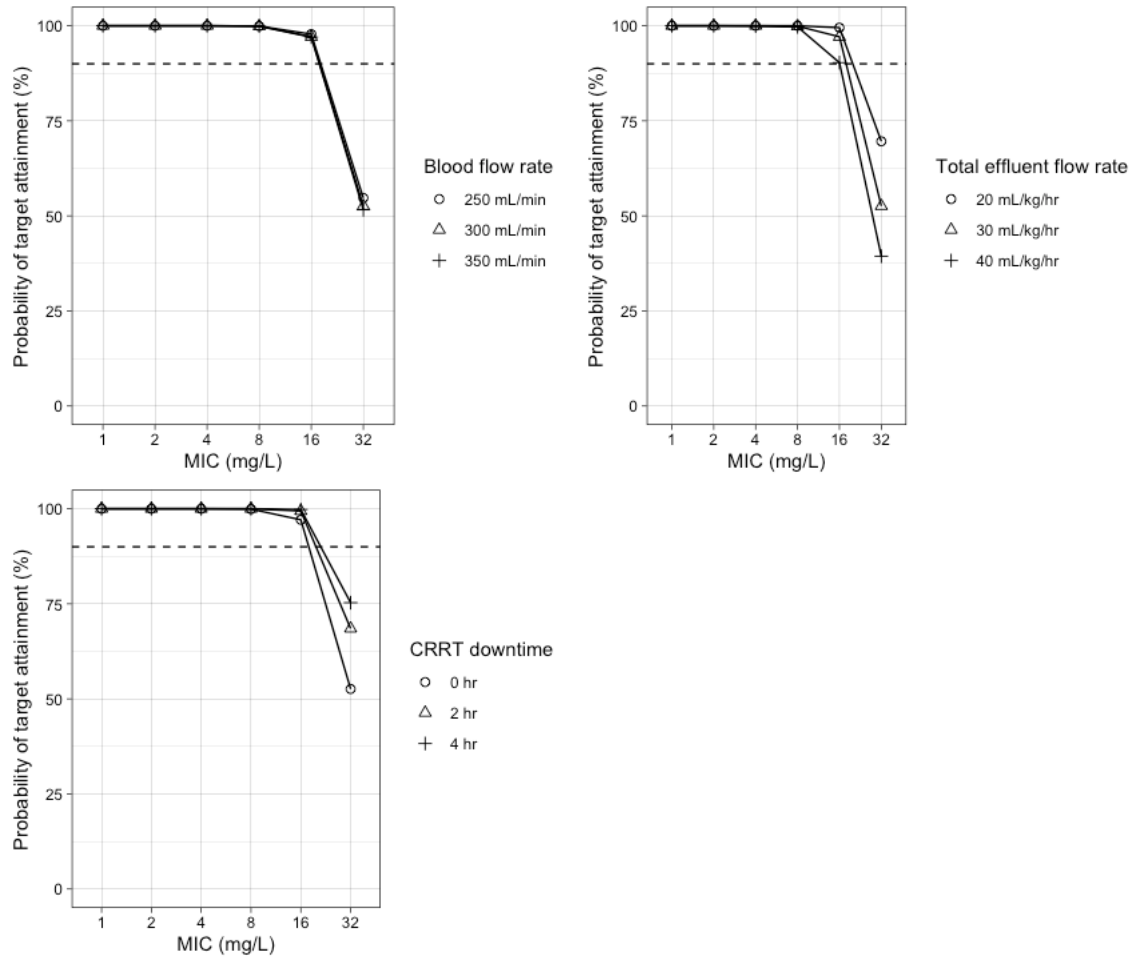

a) Downtime was simulated with every dose; b) dashed line indicates 90% probability of target attainment.

**Figure S2: Probability of 60%  $fT_{>4 \times MIC}$  target attainment a) within the first 24 hours and b) after 72 hours<sup>a,b</sup>**

**a)**

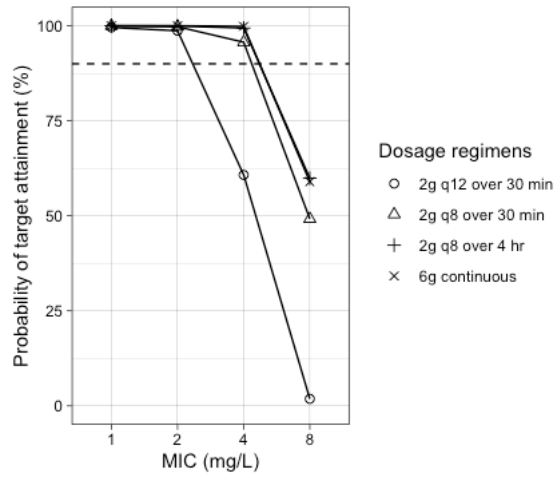

**b)**

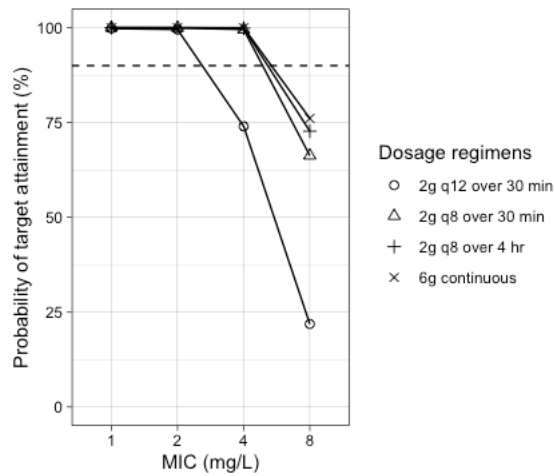

a) The following parameters were fixed at: total effluent 30 mL/kg/hr, blood flow 300 mL/min, and downtime 0 hr, b) dashed line indicates 90% probability of target attainment.

**Figure S3: Probability of free trough 20 and 70 mg/L target attainment a) within the first 24 hours and b) after 72 hours<sup>a,b</sup>**

**a)**

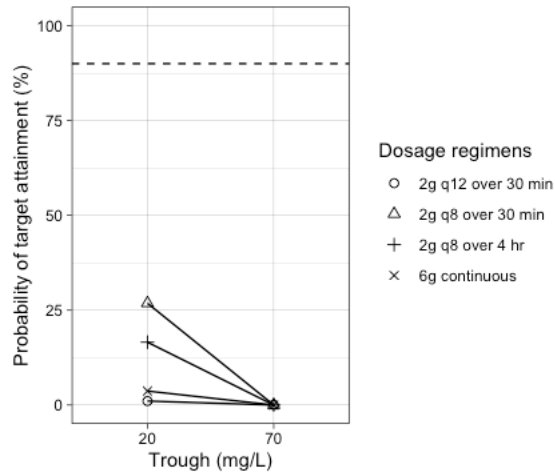

**b)**

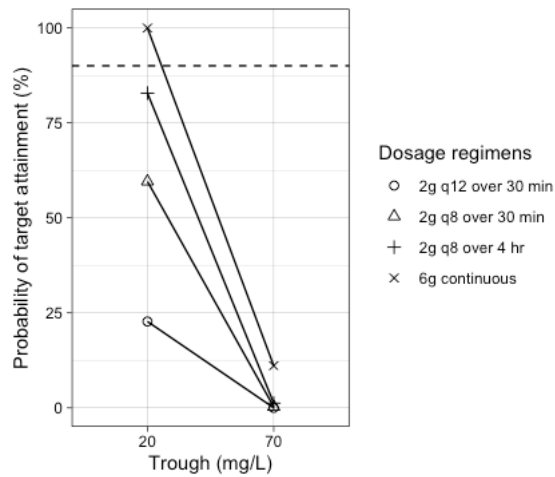

a) The following parameters were fixed at: total effluent 30 mL/kg/hr, blood flow 300 mL/min, and downtime 0 hr, b) dashed line indicates 90% probability of target attainment.
